1 **A step-by-step sequence-based analysis of virome enrichment protocol for freshwater**  
2 **and sediment samples**

3 Federica Pinto<sup>a</sup>, Moreno Zolfo<sup>a</sup>, Francesco Beghini<sup>a</sup>, Federica Armanini<sup>a</sup>, Francesco Asnicar<sup>a</sup>,  
4 Andrea Silverj<sup>a</sup>, Adriano Boscaini<sup>b</sup>, Nico Salmaso<sup>b</sup>, Nicola Segata<sup>a</sup>

5  
6 <sup>a</sup>Department CIBIO, University of Trento, Italy

7 <sup>b</sup>Hydrobiology Unit, Edmund Mach Foundation, San Michele all 'Adige, Italy

8  
9 Running Head: Sequence-based analysis of virome enrichment protocol

10

11 Keywords: filtration, virus, environmental samples, lake.

12

13 Address correspondence to Federica Pinto, [federica.pinto@unitnt.it](mailto:federica.pinto@unitnt.it) & Nicola Segata  
14 ([nicola.segata@unitn.it](mailto:nicola.segata@unitn.it))

15

16

17

18

19

20

21 **Abstract**

22 Cultivation-free metagenomic analysis afforded unprecedented details on the diversity, structure  
23 and potential functions of microbial communities in different environments. When employed to  
24 study the viral fraction of the community that is recalcitrant to cultivation, metagenomics can  
25 shed light into the diversity of viruses and their role in natural ecosystems. However, despite the  
26 increasing interest in virome metagenomics, methodological issues still hinder the proper  
27 interpretation and comparison of results across studies. Virome enrichment experimental  
28 protocols are key multi-step processes needed for separating and concentrating the viral  
29 fraction from the whole microbial community prior to sequencing. However, there is little  
30 information on their efficiency and their potential biases. To fill this gap, we used metagenomic  
31 and amplicon sequencing to examine the microbial community composition through the serial  
32 filtration and concentration steps commonly used to produce viral-enriched metagenomes. The  
33 analyses were performed on water and sediment samples from an Alpine lake. We found that,  
34 although the diversity of the retained microbial communities declined progressively during the  
35 serial filtration, the final viral fraction contained a large proportion (from 10% to 40%) of non-viral  
36 taxa, and that the efficacy of filtration showed biases based on taxonomy. Our results quantified  
37 the amount of bacterial genetic material in viromes and highlighted the influence of sample type  
38 on the enrichment efficacy. Moreover, since viral-enriched samples contained a significant  
39 portion of microbial taxa, computational sequence analysis should account for such biases in  
40 the downstream interpretation pipeline.

41

42

43

44

45 **Importance**

46 Filtration is a commonly used method to enrich viral particles in environmental samples.  
47 However, there is little information on its efficiency and potential biases on the final result. Using  
48 a sequence-based analysis on water and sediment samples, we found that filtration efficacy is  
49 dependent on sample type and that the final virome contained a large proportion of non-viral  
50 taxa. Our finding stressed the importance of downstream analysis to avoid biased interpretation  
51 of data.

52

## 53 Introduction

54 Viruses populate all kinds of ecosystems, from natural environments to human-associated  
55 ones (e.g. the gut). Their ecological importance derives not only from their astounding  
56 abundance - being the most abundant biological entities on Earth (1) - but also from the key role  
57 they play within microbial communities. In aquatic systems, viruses can regulate the microbial  
58 community influencing biogeochemical cycles and driving the exchange of genes between  
59 prokaryotic cells (2, 3). Water in the environment can comprise up to  $10^4$ - $10^8$  viral-like particles  
60 (VLP) per millilitre, but such viral diversity is still largely uncharacterised and unexplored (1).  
61 Next generation sequencing of environmental genetic material (metagenomics) has allowed the  
62 exploration of microbial diversity to an unprecedented detail (4–7). However, some key  
63 methodological limitations hinder the quantification of viral diversity and the characterization of  
64 their function within the microbial community. The small viral genome sizes that bias in nucleic  
65 acid extraction ( $<1 \text{ ng } \mu\text{l}^{-1}$ ), and the lack of universally conserved genomic regions in viral  
66 genomes are common issues faced during virome analysis, particularly for environmental  
67 samples of complex matrix such as soil or sediment (8). The separation between viral particles  
68 and the solid phase can be difficult because of their strong interactions, which depend on the  
69 physico-chemical characteristics of the particulate matter (9, 10). In order to separate viral-like  
70 particles (VLP) from particulate matter and microorganisms and to increase virus concentration  
71 (and thus viral genetic material), VLP enrichments protocols are employed. Current VLP  
72 enrichment protocols use several steps, such as dissolution, centrifugation, filtration and  
73 purification/concentration, which can vary from study to study (11–14).

74 Benchmark investigations have revealed that different viral enrichment protocols could  
75 generate different biases on the final virome product, mostly related with microbial  
76 contamination and biases against specific viruses (15–19). These findings call for strong caution  
77 on profiling and detection of VLPs in viromes, specifically when associations between  
78 pathologies and samples/microorganisms are claimed (20).

79 Filtration is a size-based procedure that is commonly used as a separation step for virome  
80 enrichment analysis. Viruses have generally size in diameter between 0.02  $\mu\text{m}$  to 0.4  $\mu\text{m}$  (21,  
81 22). The filter's pore size of 0.45  $\mu\text{m}$  and/or 0.22  $\mu\text{m}$  are normally adopted, assuming that only  
82 particles smaller than their pore size would pass through the filter and that the resulting filtrate  
83 would be therefore free of microbial cells, and enriched with viruses. However, several  
84 investigations of aquatic ecosystems revealed bacteria able to pass through 0.22  $\mu\text{m}$  filters (23).  
85 Presence of microbial genetic material has been broadly confirmed in a recent meta-analysis of  
86 viromes studies from human, animal and environmental samples. This highlighted how  
87 enrichment protocols can hinder the correct analyses of viral communities because most of the  
88 viromes were contaminated by bacterial, archaeal and fungal genetic material (18).

89 Although studies comparing and optimizing different enrichment protocols have been conducted  
90 (15–18, 24), a detailed examination of the efficacy of filtration and the effects at the microbial  
91 community level (microbial community composition) is lacking.

92 The aim of this study was to understand the effect of filtration on virome preparation. In  
93 particular, we tested its effectiveness in removing microbial cells from viral-enriched filtrate of  
94 particulate-associate and aquatic-based samples. We run a combination of serial filtration and  
95 concentration steps commonly used to produce a viral-enriched metagenome. In order to  
96 examine the composition of the microbial fraction progressively retained in the filters, amplicon  
97 sequencing of DNA recovered at each step was performed paired with shotgun sequencing of  
98 viromes. The experiment was performed with sediment and water samples of an Alpine lake, as  
99 representative of typical environmental samples.

## 100 **Results**

101 To test the effect of multiple filtrations on the composition of the input microbial community  
102 and on the induced relative abundance of the viral fraction, we performed multiple consecutive  
103 filtration steps on fresh water and sediment samples and sequenced the retained material at  
104 each step. Samples of sediment and water were collected at the deepest point (X) and along  
105 the coastline (Y) of Lake Caldonazzo, a perialpine lake in Northern Italy. Water was sampled

106 from the epilimnion (WE), thermocline (WT) and hypolimnion (WI). After filtering the input  
107 material through three filters of decreasing pores size (10, 5 and 0.22  $\mu\text{m}$ ), amplicon 16S rRNA  
108 gene sequencing was performed on each filtering to assess the richness and composition of the  
109 bacterial component. Genetic material extracted from the raw sediment was also sequenced.  
110 However, the DNA retrieved by the extraction of unfiltered lake water was under the detection  
111 limit. Therefore, the sequencing was impossible to be applied on such samples. Final enriched  
112 samples (viromes) were also analysed by means of shotgun metagenomic sequencing.

113 The amplicon sequencing data included 33 samples (4 sediment microbiomes, 25 filters and  
114 4 viromes) with a total number of operational taxonomic units (OTUs, clustered at 97%  
115 similarity) of 12,104. Shotgun sequencing obtained 322,414,388 quality-filtered paired-end  
116 reads, which were on average 92% of the initial reads (**Table 1**). Taxonomic profiling of the  
117 shotgun reads with MetaPhlan and Kraken (25, 26) showed that 99% of the reads in viromes  
118 and 60% in sediment metagenomes were not assignable (i.e. “genetic dark matter”). Differences  
119 in microbial composition were identified between particulate-associate and aquatic-based  
120 samples (Analysis of variance,  $F=6.24$ ,  $p<0.01$ ).

### 121 **Viral enrichment scores are sample-type dependent**

122 We evaluated the amount of bacterial contamination in the enriched samples obtained at the  
123 end of the filtration steps. Specifically, we compared the relative abundance of DNA fragments  
124 from ribosomal genes (16S/18S rRNA and 23S/28S rRNA genes) and universal bacterial  
125 markers (31 markers in total) in the initial unfiltered samples with the final viral enriched filtrates  
126 (viromes) using the ViromeQC tool (18). Water and sediment viral enriched filtrates (viromes)  
127 contained microbial genetic materials, as shown by the number of OTUs detected by the  
128 amplicon sequencing (**Table 1**). We found a modest viral enrichment score for the sediment  
129 samples with less than 50% bacterial depletion compared to ViromeQC compendium of water  
130 unenriched metagenomes, and an enrichment compared to metagenomes from the sample  
131 specimen smaller than one order of magnitude (6.5X for site Y and 3.75X for site X) (**Table 1**).

132 Filtration performed better in the water samples, with an enrichment score between 28.7X  
 133 and 71.1X compared to the ViromeQC reference unenriched water samples. Nonetheless, a  
 134 total of 417 reads (0.001% of the total) still mapped against 16S rRNA or 23S rRNA genes even  
 135 for the most enriched samples (WE\_CaY\_V, enrichment score = 71x).

136

|          | Sample_ID  | Site          | Filtration step | 16S          | Shotgun sequencing |                                   |                     |                      |                           |
|----------|------------|---------------|-----------------|--------------|--------------------|-----------------------------------|---------------------|----------------------|---------------------------|
|          |            |               |                 | Reads/sample | Starting reads     | Post QC, Human DNA & PhiX Removal | % of retained reads | MetaPhlan3 unknown % | ViromeQC enrichment score |
| Sediment | SED_CaX1-S | X             | Sediment        | 45,649       | 54,536,594         | 50,672,874                        | 93                  | 88                   | 0.4                       |
|          | SED_CaX1-V | X             | Virome          | 143,498      | 28,607,320         | 25,460,033                        | 89                  | 100                  | 1.5                       |
|          | SED_CaY1-S | Y             | Sediment        | 78,635       | 47,349,360         | 44,431,054                        | 94                  | 76                   | 0.2                       |
|          | SED_CaY1-V | Y             | Virome          | 208,931      | 35,839,636         | 33,694,683                        | 93                  | 100                  | 1.3                       |
| Water    | WE_CaX-V   | X_Epilimnion  | Virome          | 103,041      | 7,703,530          | 7,288,583                         | 95                  | 100                  | 28.7                      |
|          | WE_CaY-V   | Y_Epilimnion  | Virome          | 77,751       | 46,649,912         | 43,758,137                        | 94                  | 100                  | 71.1                      |
|          | WI_CaX-V   | X_Hypolimnion | Virome          | 85,225       | 50,124,568         | 45,908,161                        | 92                  | 100                  | 52.8                      |

137

138 **Table 1.** 16S and shotgun sequencing reads statistics. SED: sediment, WE: water epilimnion  
 139 WI: water hypolimnion. X: deepest point of the lake, Y: by the coastline. Extended statistics are  
 140 reported in Supplementary Table 1.

141

## 142 Effect of filtration on microbial diversity and on the detection of rare taxa

143 We next sought to examine how the different filtration steps impacted bacterial richness and  
 144 diversity. While the number of total OTUs at the initial filtration step was higher in sediment  
 145 compared to water (respectively  $3780 \pm 1638$  and  $1058 \pm 963$ , **Fig 1A**), a similar number of  
 146 OTUs were present in the final enriched samples ( $1062 \pm 243$  and  $759 \pm 79$ ). This implies that  
 147 the filtration performed differently between sediment and water matrix (72% and 28% decreases  
 148 in OTUs, **Fig 1A**). In sediment, Shannon diversity decreased along the filtration steps, indicating  
 149 a progressive elimination of the less abundant bacteria (Kruskal-Wallis,  $p < 0.01$ ). Abundant  
 150 OTUs were still present at the last step of filtration, hiding the detection of low abundant OTUs  
 151 (detection level 0.2%) (**Fig. 1D**). Conversely, in water samples, filtration removed bacterial

152 OTUs more homogeneously, with diversity and evenness indices remaining almost stable along  
153 the filtration process (Kruskal-Wallis,  $p > 0.05$ ., **Fig 1B-C**).

154 Accordingly, sediment samples displayed a significant decrease of rare species (defined by  
155 the rarity low abundance index that measures the relative proportion of species with detection  
156 level below 0.2%, regardless of their prevalence) (Kruskal-Wallis,  $p < 0.01$ . **Fig 2D**), whereas in  
157 water samples the relative proportion of rare species remained stable along filtration (**Fig 2D**).

158

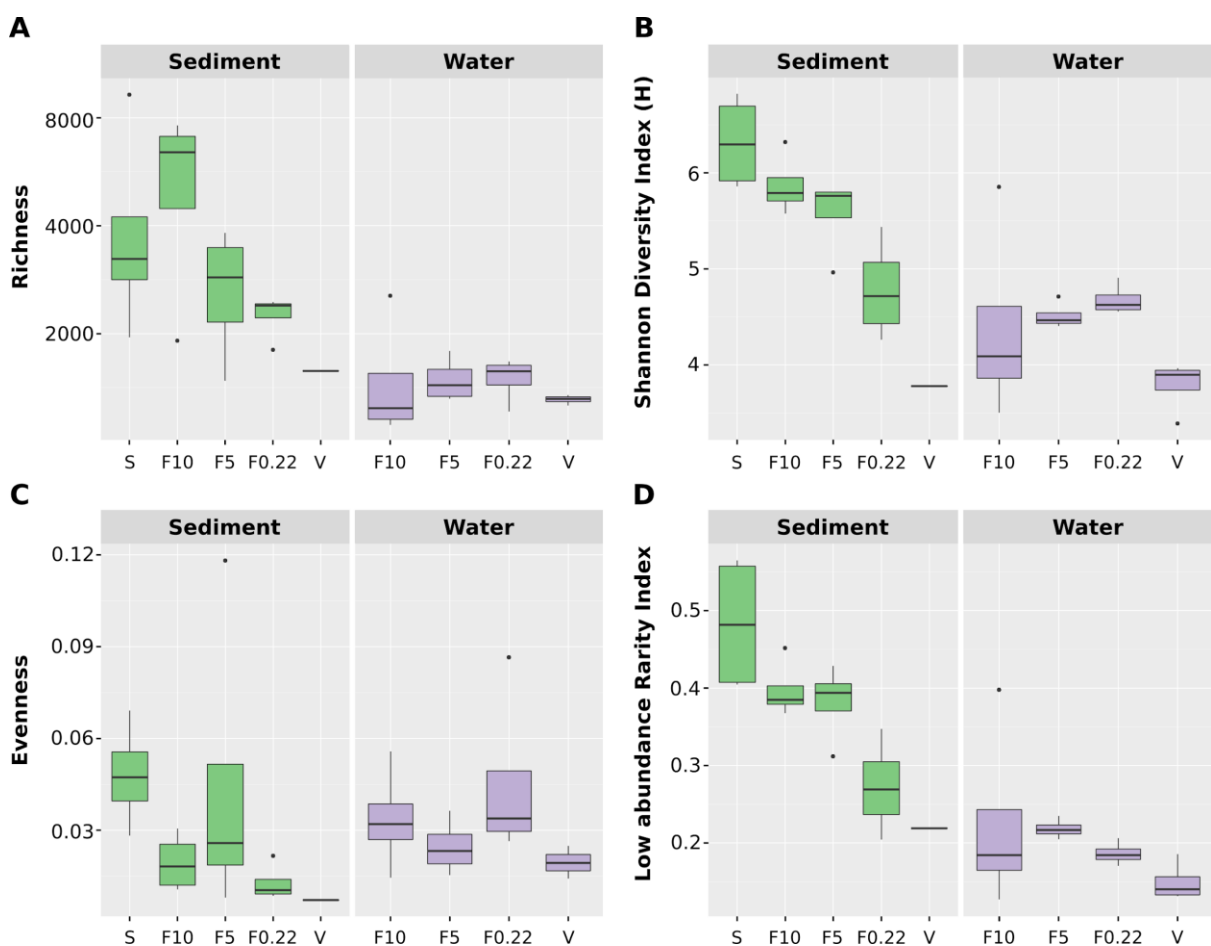

159

160 **Figure 1.** Alpha Diversity indexes of metagenomes, filters and viromes of water and  
161 sediments. Boxplots represent the alpha diversity calculated on OTUs from sediments (green)  
162 and water (purple). A) Richness, B) Shannon diversity index, C) Evenness and D) Low  
163 abundance rarity index. Boxes encompass the quartiles of the distribution, while the median is  
164 indicated as a horizontal line in each box. Whiskers extend to show 1.5 Interquartile range. X-



165 axis: filtration categories (S = raw sediment, F10 = filter 10  $\mu\text{m}$ , F5 = filter 5  $\mu\text{m}$ , F022 = filter  
166 0.22  $\mu\text{m}$ , V = virome).

167

## 168 Filtration effects on microbial composition and virome contamination

169 After assessing bacterial contamination in the enriched samples, we examined bacterial  
170 compositional changes induced by filtration steps using 16S rRNA gene amplicon sequencing.  
171 As expected, microbial communities differed significantly between water and sediment samples  
172 (ADONIS test,  $p < 0.01$ ). Multidimensional scaling (NMDS) of each experimental replicate based  
173 on Bray-Curtis dissimilarity showed that samples' clustering was coherent with filter pore sizes  
174 (0.22  $\mu\text{m}$ , 5  $\mu\text{m}$ , 10  $\mu\text{m}$ ), which were well sorted along the first NMDS axis both for sediment  
175 and water (Fig. 2).

176

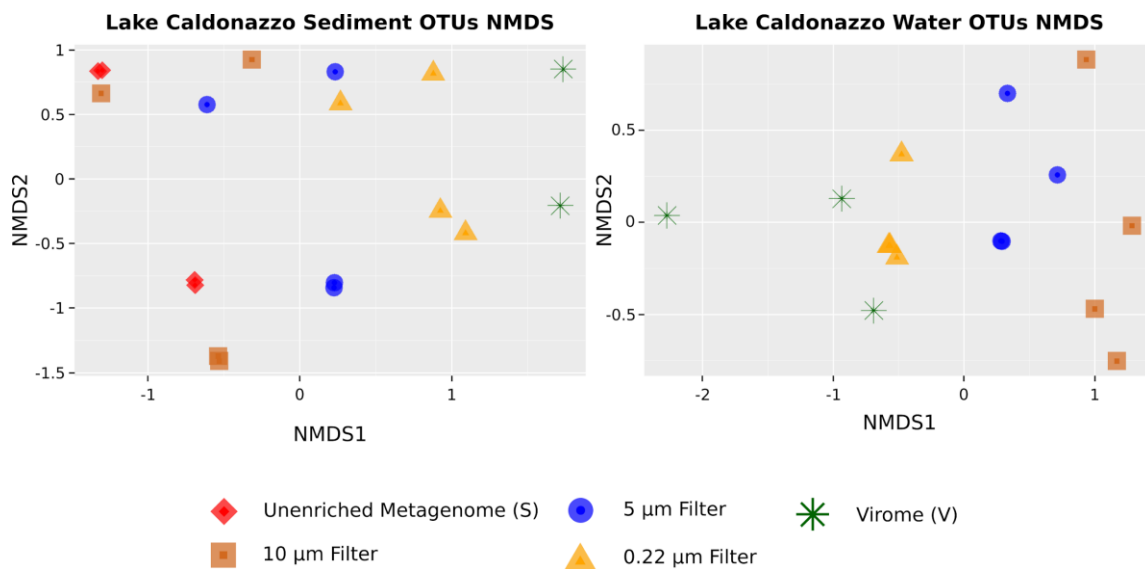

178 **Figure 2.** NMDS Analysis on OTUs from metagenomes, filters and viromes of water and  
179 sediments. Multidimensional scaling to represent dissimilarity among metagenomes extracted  
180 from different pore sizes filters and the viromes of sediment and water samples. OTUs relative  
181 abundances were used. Filtration categories: (S = raw sediment, filter 10  $\mu\text{m}$ , filter 5  $\mu\text{m}$ , filter  
182 0.22  $\mu\text{m}$ , V = virome).

183

184 We analyzed in greater detail the number of OTUs shared among filters of decreasing pore  
185 sizes. Overall, less than one tenth of the OTUs present in the original sediment sample were  
186 retrieved after the 0.22  $\mu\text{m}$  filtering step (minimum 2% maximum 9%, **Fig. 3B**) with lower  
187 retention rates for the water samples filtration (minimum 11% maximum 28%, **Fig. 3D**).  
188 Conversely, the most enriched samples included between 142 (sediment) and 507 (water)  
189 unique OTUs that were not detected in the starting (i.e unenriched) samples, and were hence  
190 specific of the enriched viromes. While few of these virome-specific OTUs could still be the  
191 result of contamination in such low-biomass samples not detected by our computational  
192 contamination detection, the majority of these OTUs likely represents taxa that were below the  
193 limit of detection in the unenriched samples.

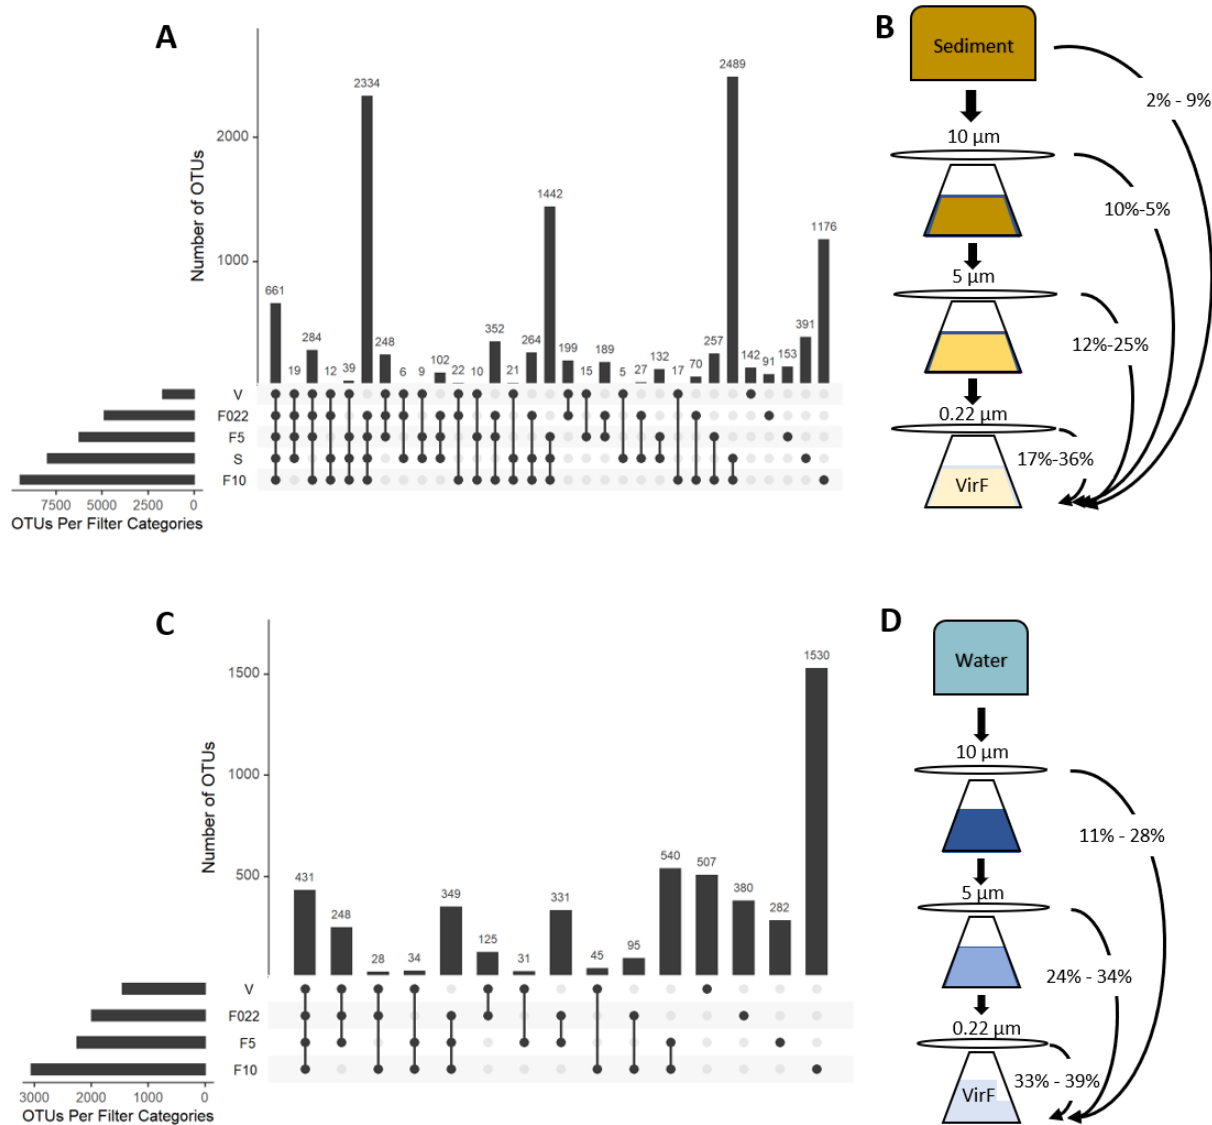

194

195

196

197

198

199

200

201

202

203

**Figure 3.** Shared and unique OTUs for the different steps of sequential filtration categories (i.e. the rows). Single dots represent taxa unique to each filtration category; connected dots represent the intersection (shared taxa) among the filtration categories. The y-axis indicates the number of unique or shared OTUs (also reported for each intersection on top of bars) among the categories shown with the dots below. A-B) Sediment samples. A) Shared OTUs among and between filters and viromes. B) Pairwise percentage of shared OTUs, viromes vs filters. C-D) Water samples. C) Shared OTUs among and between filters and viromes. D) Pairwise percentage of shared OTUs, viromes vs filters.

204 Along the filtration steps, the taxonomic composition of water and sediments differed at  
205 phylum (**Fig. 4**) and more evidently at family level (**Supplementary Figure 1**) in the final  
206 enriched filtrates. At the initial stage of filtration, Proteobacteria, Cyanobacteria, Bacteroidetes  
207 and Planctomycetes were the most abundant phyla. Viromes were still characterised mostly by  
208 these phyla, with members of Firmicutes at higher relative abundances (from 5 to 10%). The  
209 virome-specific OTUs clearly differed between sediment and water. Sediments were still  
210 dominated by Proteobacteria (90%) and Firmicutes (from 5 to 8%), whereas in water a more  
211 diverse community was retrieved, including Actinobacteria (from 4 to 8%) and members of the  
212 candidate phyla radiation (CPR) (from 0.1 to 3%) such as TM6, Microgenomates,  
213 Parcubacteria, Peregrinibacteria, Saccharibacteria and Omnitrophica.

214

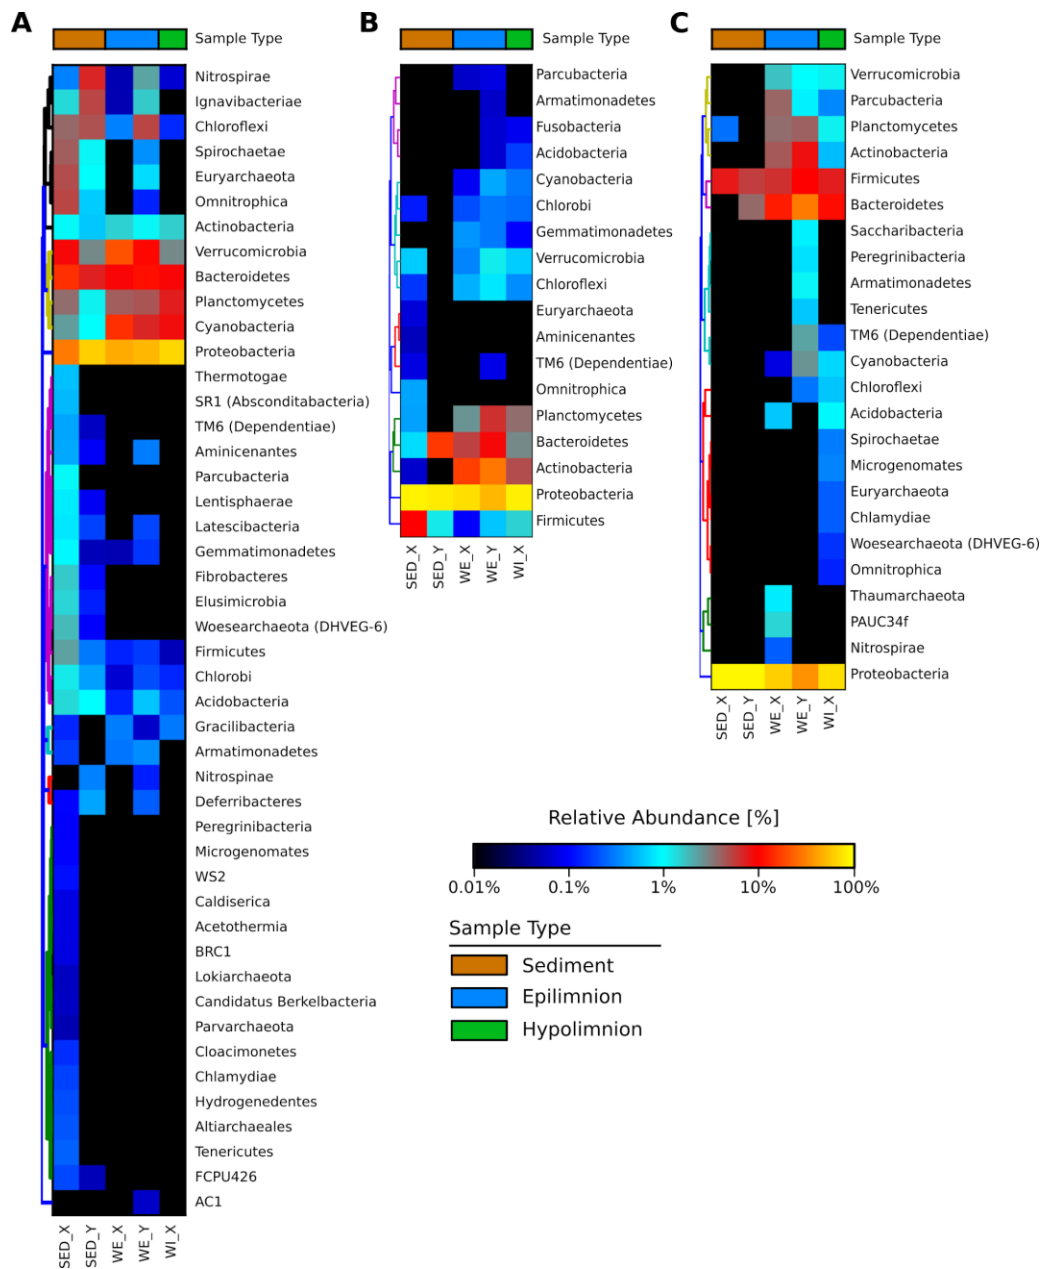

215

216 **Figure 4.** Heatmap of OTUs relative abundance at Phylum level. OTUs relative abundance is  
 217 shown for A) OTUs at the starting point of filtration. Water samples refer to the OTUs detected  
 218 in the 10µm filters. B) Enriched viromes total OTUs and C) Enriched viromes unique OTUs.  
 219 Family level relative abundances are shown in Supplementary Figure 1.

220

## 221 **Discussion**

222 Assigning sequences to viruses poses considerable computational challenges in the study of  
223 viromes. The elimination of the genetic material of non-viral origin from the samples is thus  
224 fundamental to simplify analyses and avoid biased interpretations. Our study is among the first  
225 to specifically test the efficacy of the filtration steps used to eliminate microbial cells from  
226 environmental samples during viral enrichment protocols. Particularly, we examined changes in  
227 microbial composition occurring throughout the filtration process until the final viral enriched  
228 filtrate.

229 We found that the efficacy of filtration differed between water and sediment samples. The  
230 filtration was more effective in water-based samples where it appeared to homogeneously retain  
231 microbial species. As such, filtration in water produced viromes that were orders of magnitude  
232 more enriched than sediment, as indicated by the ViromeQC enrichment score (18). This result  
233 further indicates that the presence of particles and minerals in the sample matrix, such as  
234 sediments (27, 28) and, more specifically, sediment characteristics such as porosity and organic  
235 matter content, can profoundly influence the efficacy of viral enrichment (12, 29). Consequently,  
236 different approaches have been used to account for the retention properties of similar matrices  
237 (e.g. soil/sediment, faeces, respiratory samples), such as sample homogenization, as employed  
238 here (21, 30, 31). However, our results indicate that additional investigations are needed to  
239 develop better laboratory protocols.

240 Water samples produced much higher enrichment scores, and yet we still detected  
241 substantial microbial genetic material in the final enriched samples. This calls for caution when  
242 downstream sequence analyses are performed, even after apparent successful enrichment, as  
243 it cannot be assumed that the sample contains only viral particles.

244 Examination of changes in microbial diversity during filtration, provided additional details on  
245 how the process differed between sample types. The progressive decline in Shannon diversity  
246 and rare species along the filtration steps in sediment samples implies that the efficacy of

247 filtration primarily reflected the relative abundance of taxa, whereby common taxa were more  
248 likely to pass through. Conversely, filtration of taxa in water samples appeared to be less  
249 dependent on their relative abundance, with both common and rare taxa equally likely to be  
250 retained, as indicated by the more stable diversity values. This suggests that filtration in  
251 sediments might be relatively more stochastic compared to water samples, where taxa were  
252 presumably retained according to their cell size, rather than to their abundance. As previously  
253 mentioned, the presence of particle aggregates in the sediment matrix might explain these  
254 results, and the lower efficacy of the enrichment.

255 Although the enrichment differed between sample matrices, filtration steps produced  
256 consistent compositional changes across replicate filters in both water and sediment samples,  
257 with the first NMDS axis mirroring the distribution of pore sizes (**Fig. 2**). This indicates that,  
258 regardless of the overall efficacy, filtration procedures can produce consistent and reproducible  
259 outcomes within a given sample matrix.

260 The key assumption of the enrichment protocols is that only particles smaller than the  
261 minimum filter pore size (0.45  $\mu\text{m}$  and/or 0.22  $\mu\text{m}$ ) are able to pass through (22). However, in  
262 line with other recent studies (17, 18, 32, 33), results from our experiments indicate that viral  
263 enriched samples still contained microbial genetic material. This could have practical  
264 implications in many research fields. A recent meta-analysis of viromes studies from human,  
265 animal and environmental samples, highlighted how commonly used enrichment protocols can  
266 hinder the correct analyses of viral communities because of contamination by bacterial, Archaea  
267 or fungal genetic material (18). Besides contamination occurring during the experimental  
268 procedures, the detection of microbial genetic material in the enriched filtrates could be  
269 associated to i) changes in cell size and shape due to external factors; and ii) presence of very  
270 small bacteria, such as those belonging to the newly discovered Candidate Phyla Radiation  
271 (CPR) (34–36).

272 Together with the presence of Planococcaceae, Pseudomonadaceae and Sphingobacteriaceae  
273 that are commonly found in aquatic and terrestrial habitats (37, 38), viromes also included

274 material from rod-shaped cells such as Oxalobacteraceae, anaerobic purple sulfur  
275 Chromatiaceae (39, 40) in sediment and Bryobacter (Acidobacteria) (41) in water. These are  
276 small bacteria of 0.3  $\mu\text{m}$  - 0.5  $\mu\text{m}$  cell width, which could pass through the smallest pore size  
277 filter (42).

278 Among the water virome unique OTUs, candidate phyla radiation (CPR) were retrieved. These  
279 small bacteria (0.009  $\pm$  0.002  $\mu\text{m}$ ) such as TM6, Microgenomates, Parcubacteria,  
280 Peregrinibacteria, Saccharibacteria and Omnitrophica, were detected in the enriched final  
281 filtrates but were under the limit of detection level at the starting point of filtration. Thus,  
282 apparently efficient filtration might enrich not only viral particles but also low abundant microbial  
283 species.

284 Overall, our examination of microbial community diversity and composition associated with the  
285 standard virus enrichment protocols, highlight how non-viral particles can be relatively abundant  
286 in environmental enriched viromes. We argue that additional effort is needed to further optimise  
287 and test viral enrichment approaches, and that researchers analysing and profiling VLPs should  
288 be aware of their potential presence.

289

## 290 **Materials and Methods**

### 291 *Study site and sampling*

292 Caldonazzo Lake is a meso-eutrophic lake located at an elevation of 449 m in Trentino, Italy.  
293 Sampling occurred in March 2017 during the lake stratification period in two sites, at the  
294 deepest point (X, 49 m depth) and close to the coastline (Y, 7 m depth). Specifically, the first 2  
295 cm of four sediment cores were collected in duplicates and pooled together to collect in total  
296 200 g of sediment. Water samples (2 L) were collected from the two sites (X and Y) at different  
297 depths: at the epilimnion (WE. 3 m), thermocline (WT. 10 m) and hypolimnion (WI. 49 m) of the  
298 stratified lake. All bottles and devices were acid rinsed and autoclaved before use.



299

300 *Microbial and viral DNA extraction*

301 Sediments (100 g) were treated with sodium pyrophosphate (final concentration 5 mM),  
302 sonicated and centrifuged in order to separate and collect the sediment pore water (100 mL).  
303 Samples (2 L of lake water and 100 mL of sediment pore water) were then serially filtered  
304 through 10 µm, 5 µm and 0.22 µm filter pore size (**Fig. 5**) (Whatman filter, Merck KGaA,  
305 Darmstadt, Germany) using sterilised filtration units (Nalgene, Thermo Fisher Scientific, USA)  
306 mounted on sterile glass bottles. Filters were stored at -20 °C. Virus-like particles (VLPs) in the  
307 final filtrate, defined here as the viral fraction, were then concentrated using the iron chloride  
308 precipitation protocol (43) and Amicon Ultra filters (100KDa), reaching a final volume of 1-2 mL.  
309 Samples were stored at -80 °C.

310 DNA was extracted from both filters and viral fractions using different protocols. The 10, 5  
311 and 0.22 µm pore-size filters were processed using the DNeasy PowerWater Kit (QIAGEN,  
312 Hilden, Germany) following the manufacture instructions. Viral fractions, instead, were first  
313 treated with DNase I (15U mL<sup>-1</sup>) for 1 h at 37°C; then DNA was extracted using QIAamp DNA  
314 Mini Kit (QIAGEN, Hilden, Germany). Metagenomes DNA were extracted using DNeasy  
315 PowerSoil Kit (QIAGEN, Hilden, Germany) directly from sediment (250 mg) following the  
316 manufacture instructions. The extraction was also performed with the unfiltered lake water, but  
317 the retrieved genetic material was under the detection limit. Therefore, the sequencing was  
318 impossible to be applied on such samples. The DNA was quantified using the Qubit™ dsDNA  
319 HS Assay Kit (Life Technologies, Carlsbad, CA).

320

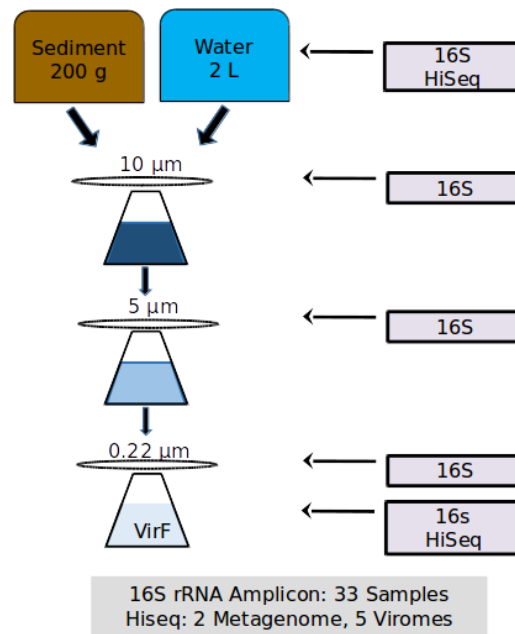

**Figure 5.** Overview of the extraction procedure. Overall, 33 16S rRNA gene amplicon libraries and 7 shotgun libraries were extracted from freshwater and sediments. The type of library is indicated in the gray boxes on the right. VirF stands for “Viral Fraction”. Pore sizes are indicated above each filter.

#### *16S rRNA Amplicon and shotgun sequencing*

To characterise the microbial community along filtration, DNA from filters, from sediments and from viral filtrates were subjected to PCR amplification of the 16S rRNA variable regions V4 (Primer 515f/806r) (44). Amplicons were pooled and sequenced on an Illumina MiSeq platform.

Shotgun sequencing was applied to the DNA extracted directly from sediment (metagenomes) and to viral fractions (viromes). Libraries, prepared using Nextera XT DNA Library Prep Kit (Illumina) according to the manufacturer’s instructions, were quality checked by the Perkin Elmer LabChip GX (Perkin Elmer) and sequenced on a HiSeq 2500 platform (Illumina).

#### *Bioinformatic and statistical analysis*

337 16S rRNA gene analysis was performed with QIIME with default parameters for demultiplexing,  
338 quality filtering, and clustering reads into OTUs (45). Operational taxonomic units (OTUs) were  
339 picked with the open-reference approach and the SILVA database release 128 at 97%  
340 clustering (46). In R, data were processed using phyloseq (47), vegan (48) and UpsetR (49)  
341 packages. Archaea, Chloroplast and Mitochondria were removed from the dataset. For the non-  
342 metric multidimensional scaling (NMDS, default square-root and Wisconsin double  
343 standardisation of values) community analysis, Bray-Curtis dissimilarity was used after  
344 removing rare OTUs (<5 occurrences). From vegan package, adonis analysis was performed to  
345 determine the differences between habitats, filters and sampling location. Differences in  
346 bacterial diversity indexes over the filtration process were tested using a linear regression  
347 model, setting as base level the first step of filtration (raw sediment and filter 10 µm for water).  
348 Bacterial richness was log transformed. To determine and represent shared OTUs among  
349 categories (filters and viromes) and unique OTUs, upsetR was applied.

350 Raw metagenomic reads were preprocessed with Trim Galore (50) to remove low quality (i.e.  
351 Phred score < 20) and short (i.e. length < 75 bp) reads (parameters: --stringency 5 --length 75 --  
352 quality 20 --max\_n 2 --trim-n). Metagenomes were analyzed with MetaPhlAn (25) v. 3.0 with the  
353 --unknown\_estimation option and Kraken2 (26), version 2.0.8 and Braken (51) To  
354 quantify also the percentage of reads that could not be assigned to any taxa, the percentage of  
355 “unknown reads” was taken from the output of the two tools (i.e. --unknown\_estimation in  
356 MetaPhlAn). These percentages are reported in **Supplementary Table 1**.

357 Viral enrichment was calculated with ViromeQC, a computational tool that estimates the efficacy  
358 of VLP enrichment by quantifying the abundance of unwanted microbial contaminants.  
359 ViromeQC estimates the abundance of contaminants from the raw metagenomic reads via the  
360 16S/18S and 23S/28S rRNA gene abundances, and from 31 single-copy bacterial markers.  
361 ViromeQC version 1.0 (18) was run on the metagenomic reads with the --environmental option.

362 **Data Availability**

363 The raw sequencing reads of the 16S rRNA amplicon sequencing and shotgun metagenomics  
364 were submitted to the NCBI-SRA archive and are available under the BioProject PRJNA658338.

365 **Acknowledgements**

366 This project received funding from the European Union's Horizon 2020 research and innovation  
367 programme under the Marie Skłodowska-Curie grant agreement No. 704603 to FP and the  
368 European Research Council (ERC-STG project MetaPG No. 716575) to NS. We would like to  
369 thank Stefano Larsen and Nicolai Karcher for their feedback and technical support.

370

371 **References**

372

- 373 1. C. A. Suttle, Marine viruses—major players in the global ecosystem. *Nat. Rev. Microbiol.* **5**,  
374 801 (2007).
- 375 2. C. Canchaya, G. Fournous, S. Chibani-Chennoufi, M. L. Dillmann, H. Brüssow, Phage as  
376 agents of lateral gene transfer. *Curr. Opin. Microbiol.* **6**, 417–424 (2003).
- 377 3. X. Wang, *et al.*, Cryptic prophages help bacteria cope with adverse environments. *Nat.*  
378 *Commun.* **1**, 147 (2010).
- 379 4. G. W. Tyson, *et al.*, Community structure and metabolism through reconstruction of  
380 microbial genomes from the environment. *Nature* **428**, 37–43 (2004).
- 381 5. J. C. Venter, *et al.*, Environmental genome shotgun sequencing of the Sargasso Sea.  
382 *Science* **304**, 66–74 (2004).
- 383 6. D. M. S, S. De Mandal, A. K. Panda, Microbial Ecology in the Era of Next Generation  
384 Sequencing. *Journal of Next Generation Sequencing & Applications* **01** (2015).
- 385 7. A. S. Hahn, K. M. Konwar, S. Louca, N. W. Hanson, S. J. Hallam, The information science  
386 of microbial ecology. *Curr. Opin. Microbiol.* **31**, 209–216 (2016).
- 387 8. D. Pan, Y. Morono, F. Inagaki, K. Takai, An Improved Method for Extracting Viruses From  
388 Sediment: Detection of Far More Viruses in the Subseafloor Than Previously Reported.  
389 *Front. Microbiol.* **10**, 878 (2019).
- 390 9. M. G. Weinbauer, J. R. Dolan, K. Šimek, A population of giant tailed virus-like particles  
391 associated with heterotrophic flagellates in a lake-type reservoir. *Aquat. Microb. Ecol.* **76**,

- 392 111–116 (2015).
- 393 10. F. Hassard, *et al.*, Abundance and Distribution of Enteric Bacteria and Viruses in Coastal  
394 and Estuarine Sediments—a Review. *Frontiers in Microbiology* **7** (2016).
- 395 11. A. Lopez-Bueno, *et al.*, High Diversity of the Viral Community from an Antarctic Lake.  
396 *Science* **326**, 858–861 (2009).
- 397 12. J. L. Castro-Mejía, *et al.*, Optimizing protocols for extraction of bacteriophages prior to  
398 metagenomic analyses of phage communities in the human gut. *Microbiome* **3**, 64 (2015).
- 399 13. D. Aguirre de Carcer, A. Lopez-Bueno, D. A. Pearce, A. Alcamí, Biodiversity and  
400 distribution of polar freshwater DNA viruses. *Science Advances* **1**, e1400127–e1400127  
401 (2015).
- 402 14. S. C. Watkins, *et al.*, Assessment of a metaviromic dataset generated from nearshore Lake  
403 Michigan. *Mar. Freshwater Res.* **67**, 1700–1708 (2016).
- 404 15. R. V. Thurber, M. Haynes, M. Breitbart, L. Wegley, F. Rohwer, Laboratory procedures to  
405 generate viral metagenomes. *Nat. Protoc.* **4**, 470–483 (2009).
- 406 16. A. N. Shkoporov, *et al.*, Reproducible protocols for metagenomic analysis of human faecal  
407 phageomes. *Microbiome* **6**, 68 (2018).
- 408 17. S. Roux, M. Krupovic, D. Debroas, P. Forterre, F. Enault, Assessment of viral community  
409 functional potential from viral metagenomes may be hampered by contamination with  
410 cellular sequences. *Open Biol.* **3**, 130160 (2013).
- 411 18. M. Zolfo, *et al.*, Detecting contamination in viromes using ViromeQC. *Nat. Biotechnol.* **37**,  
412 1408–1412 (2019).
- 413 19. A. C. Gregory, O. Zablocki, A. Howell, B. Bolduc, The human gut virome database. *BioRxiv*  
414 (2019).

- 415 20. M. Asplund, *et al.*, Contaminating viral sequences in high-throughput sequencing viromics:  
416 a linkage study of 700 sequencing libraries. *Clin. Microbiol. Infect.* **25**, 1277–1285 (2019).
- 417 21. A. Reyes, N. P. Semenkovich, K. Whiteson, F. Rohwer, J. I. Gordon, Going viral: next-  
418 generation sequencing applied to phage populations in the human gut. *Nat. Rev. Microbiol.*  
419 **10**, 607–617 (2012).
- 420 22. C. d’Humières, *et al.*, A simple, reproducible and cost-effective procedure to analyse gut  
421 phageome: from phage isolation to bioinformatic approach. *Sci. Rep.* **9**, 11331 (2019).
- 422 23. L.-A. J. Ghuneim, D. L. Jones, P. N. Golyshin, O. V. Golyshina, Nano-Sized and Filterable  
423 Bacteria and Archaea: Biodiversity and Function. *Front. Microbiol.* **9**, 1971 (2018).
- 424 24. A. C. Gregory, *et al.*, The Gut Virome Database Reveals Age-Dependent Patterns of  
425 Virome Diversity in the Human Gut. *Cell Host Microbe* (2020)  
426 <https://doi.org/10.1016/j.chom.2020.08.003>.
- 427 25. D. T. Truong, *et al.*, MetaPhlan2 for enhanced metagenomic taxonomic profiling. *Nat.*  
428 *Methods* **12**, 902–903 (2015).
- 429 26. D. E. Wood, J. Lu, B. Langmead, Improved metagenomic analysis with Kraken 2. *Genome*  
430 *Biol.* **20**, 257 (2019).
- 431 27. D. A. Bazylinski, R. B. Frankel, Magnetosome formation in prokaryotes. *Nat. Rev. Microbiol.*  
432 **2**, 217–230 (2004).
- 433 28. M. P. Taylor, K. A. Hudson-Edwards, The dispersal and storage of sediment-associated  
434 metals in an arid river system: the Leichhardt River, Mount Isa, Queensland, Australia.  
435 *Environ. Pollut.* **152**, 193–204 (2008).
- 436 29. R. R. Helton, L. Liu, K. E. Wommack, Assessment of factors influencing direct enumeration  
437 of viruses within estuarine sediments. *Appl. Environ. Microbiol.* **72**, 4767–4774 (2006).

- 438 30. M. Breitbart, *et al.*, Viral diversity and dynamics in an infant gut. *Res. Microbiol.* **159**, 367–  
439 373 (2008).
- 440 31. C. Kohl, *et al.*, Protocol for Metagenomic Virus Detection in Clinical Specimens<sup>1</sup>. *Emerging*  
441 *Infectious Diseases* **21** (2015).
- 442 32. Y. Wang, F. Hammes, M. Düggelin, T. Egli, Influence of size, shape, and flexibility on  
443 bacterial passage through micropore membrane filters. *Environ. Sci. Technol.* **42**, 6749–  
444 6754 (2008).
- 445 33. M. Bekliz, J. Brandani, M. Bourquin, T. J. Battin, H. Peter, Benchmarking protocols for the  
446 metagenomic analysis of stream biofilm viromes. *PeerJ* **7**, e8187 (2019).
- 447 34. A. V. Fedotova, Y. M. Serkebaeva, V. V. Sorokin, S. N. Dedysh, Filterable microbial forms  
448 in the Rybinsk water reservoir. *Microbiology* **82**, 728–734 (2013).
- 449 35. R. S. Kantor, *et al.*, Small genomes and sparse metabolisms of sediment-associated  
450 bacteria from four candidate phyla. *MBio* **4**, e00708–13 (2013).
- 451 36. B. Luef, *et al.*, Diverse uncultivated ultra-small bacterial cells in groundwater. *Nat.*  
452 *Commun.* **6**, 6372 (2015).
- 453 37. S. Shivaji, T. N. R. Srinivas, G. S. N. Reddy, “The family planococcaceae” in (Berlin:  
454 Springer-Verlag, 2014).
- 455 38. A. Lambiase, The family sphingobacteriaceae. *The Prokaryotes* **4**, 907–9014 (2014).
- 456 39. E. Rosenberg, E. F. DeLong, S. Lory, S. Stackebrandt, F. Thompson, “The Family  
457 Chromatiaceae” in *The Prokaryotes. Gammaproteobacteria*, E. Rosenberg, E. F. DeLong,  
458 S. Lory, S. Stackebrandt, F. Thompson, Eds. (Springer, 2014), pp. 151–178.
- 459 40. J. I. Baldani, *et al.*, “The Family Oxalobacteraceae” in *The Prokaryotes:*  
460 *Alphaproteobacteria and Betaproteobacteria*, E. Rosenberg, E. F. DeLong, S. Lory, E.



- 461           Stackebrandt, F. Thompson, Eds. (Springer Berlin Heidelberg, 2014), pp. 919–974.
- 462   41. I. S. Kulichevskaya, N. E. Suzina, W. Liesack, S. N. Dedysh, *Bryobacter aggregatus* gen.  
463       nov., sp. nov., a peat-inhabiting, aerobic chemo-organotroph from subdivision 3 of the  
464       Acidobacteria. *Int. J. Syst. Evol. Microbiol.* **60**, 301–306 (2010).
- 465   42. S. Cesar, K. C. Huang, Thinking big: the tunability of bacterial cell size. *FEMS Microbiol.*  
466       *Rev.* **41**, 672–678 (2017).
- 467   43. S. G. John, *et al.*, A simple and efficient method for concentration of ocean viruses by  
468       chemical flocculation. *Environ. Microbiol. Rep.* **3**, 195–202 (2011).
- 469   44. J. G. Caporaso, *et al.*, Global patterns of 16S rRNA diversity at a depth of millions of  
470       sequences per sample. *Proc. Natl. Acad. Sci. U. S. A.* **108 Suppl 1**, 4516–4522 (2011).
- 471   45. J. G. Caporaso, *et al.*, QIIME allows analysis of high-throughput community sequencing  
472       data. *Nat. Methods* **7**, 335–336 (2010).
- 473   46. C. Quast, *et al.*, The SILVA ribosomal RNA gene database project: improved data  
474       processing and web-based tools. *Nucleic Acids Res.* **41**, D590–6 (2013).
- 475   47. P. J. McMurdie, S. Holmes, phyloseq: an R package for reproducible interactive analysis  
476       and graphics of microbiome census data. *PLoS One* **8**, e61217 (2013).
- 477   48. F. G. B. Jari Oksanen, *et al.*, Vegan: community ecology package. *R package version 2*  
478       (2018).
- 479   49. A. Lex, N. Gehlenborg, H. Strobel, R. Vuillemot, H. Pfister, UpSet: Visualization of  
480       Intersecting Sets. *IEEE Trans. Vis. Comput. Graph.* **20**, 1983–1992 (2014).
- 481   50. F. Krueger, Trim galore. *A wrapper tool around Cutadapt and FastQC to consistently apply*  
482       *quality and adapter trimming to FastQ files* (2015).
- 483   51. J. Lu, F. P. Breitwieser, P. Thielen, S. L. Salzberg, Bracken: estimating species abundance

484 in metagenomics data. *PeerJ Comput. Sci.* **3**, e104 (2017).

485
